# Supplementary material for: Effect of advanced intercrossing on genome structure and on the power to detect linked quantitative trait loci in a multi-parent population: a simulation study in rice
Source: PubMed Central journal article supplement (PMC4101851; doi:10.1186/1471-2156-15-50), 2014-04-27

Additional file 2. Distribution of PVEs of the simulated QTLs. A and B correspond to the distribution of PVEs of the simulated QTLs used in Fig. 6A and B.

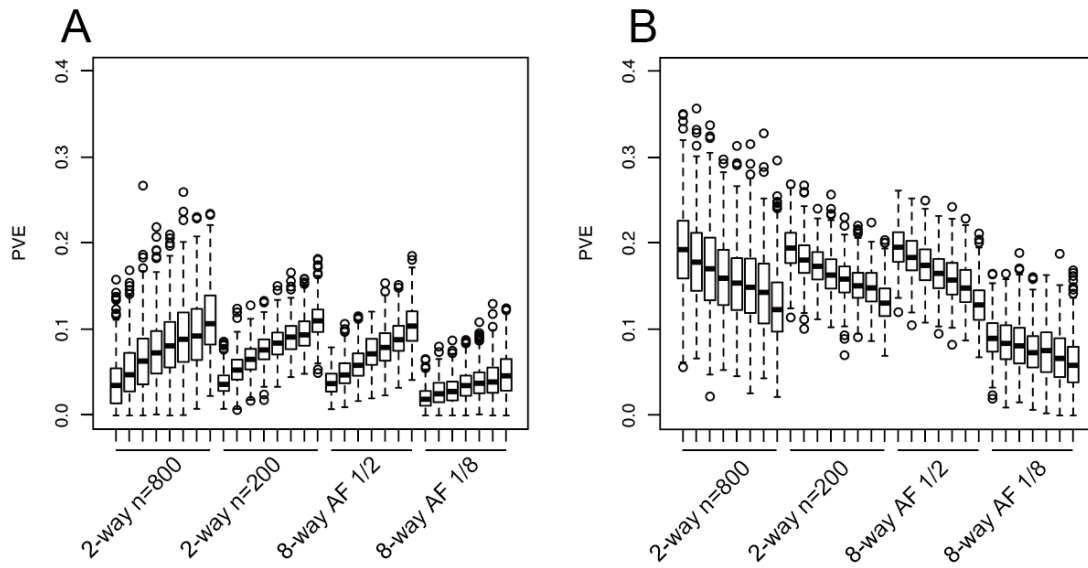

Supplement: 1471-2156-15-50-S2.pdf [file 1471-2156-15-50-S2.pdf]
