# Supplementary material for: Effect of advanced intercrossing on genome structure and on the power to detect linked quantitative trait loci in a multi-parent population: a simulation study in rice
Source: PubMed Central journal article supplement (PMC4101851; doi:10.1186/1471-2156-15-50), 2014-04-27

Additional file 3. Distribution of PVEs of the simulated QTLs. Experiment 1 to 3 correspond to those in Table 8.

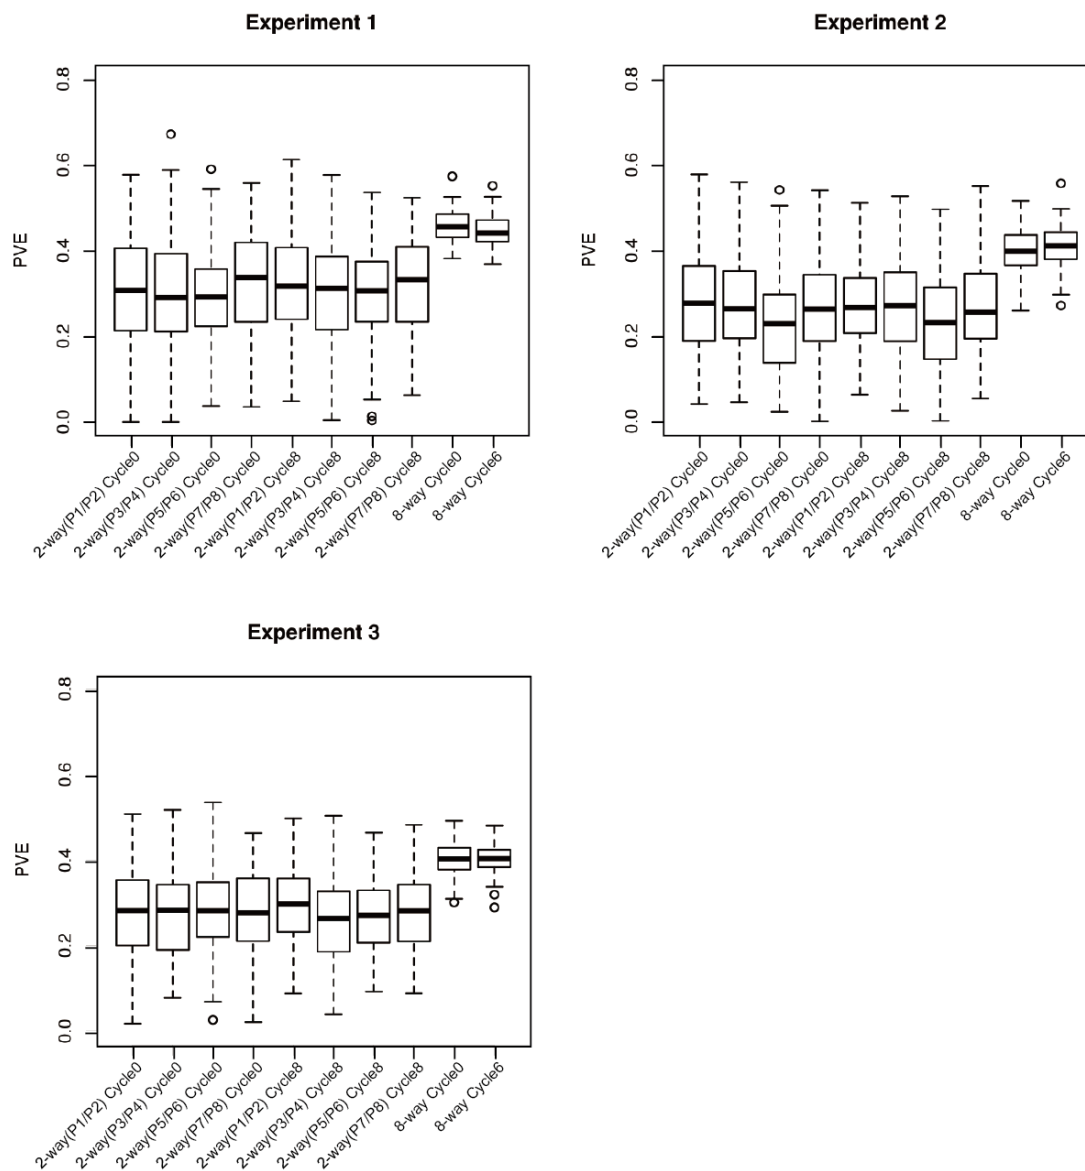

Supplement: 1471-2156-15-50-S3.pdf [file 1471-2156-15-50-S3.pdf]
